# Supplementary material for: A single-cell characterised signature integrating heterogeneity and microenvironment of lung adenocarcinoma for prognostic stratification
Source: PubMed Central journal article supplement — eBioMedicine. 2024 Mar 28;102:105092. doi: 10.1016/j.ebiom.2024.105092 (PMC10990706; doi:10.1016/j.ebiom.2024.105092), 2024-03-28
Supplement: mmc1.pdf [file mmc1.pdf]

## Supplementary Materials

|                                                                                                 |    |
|-------------------------------------------------------------------------------------------------|----|
| Supplementary Tables .....                                                                      | 2  |
| Table S1 Survival analysis results of eleven genes in public databases .....                    | 2  |
| Table S2. Validation results of 11-gene model in public database and in-house cohorts .....     | 4  |
| Supplementary Figures and legends .....                                                         | 5  |
| Figure S1. Detailed cluster information and related analysis. ....                              | 5  |
| Figure S2. Functional and survival details of EPCAM+ cells related genes. ....                  | 6  |
| Figure S3. The T cell subsets and relevant analysis. ....                                       | 7  |
| Figure S4. Functional details of five different Ma/Mo subsets. ....                             | 8  |
| Figure S5. CIBERSORT and XCELL results of tumor microenvironment in TCGA and GSE datasets. .... | 9  |
| Figure S6. Volcano and bubble plots of functional analysis in GSE and bulk datasets. ....       | 10 |
| Figure S7. Results of drug sensitivity analysis. ....                                           | 11 |

## Supplementary Tables

**Table S1 Survival analysis results of eleven genes in public databases**

| Genes           | Datasets | Group  | Median OS<br>(months) | 95%CI<br>of median<br>survival time | HR   | 95%CI<br>of HR | P       |
|-----------------|----------|--------|-----------------------|-------------------------------------|------|----------------|---------|
| <i>HLA-DPBI</i> | TCGA     | Higher | 59.1                  | 50.0-87.3                           | 0.65 | 0.48-0.87      | 0.0039  |
|                 |          | Lower  | 41.5                  | 37.2-49.9                           |      |                |         |
|                 | K-M      | Higher | 22.6                  |                                     | 0.36 | 0.17-0.77      | 0.0057  |
|                 |          | Lower  | 11.6                  |                                     |      |                |         |
| <i>FAM83A</i>   | TCGA     | Higher | 41.0                  | 33.2-53.3                           | 1.71 | 1.27-2.31      | 0.00034 |
|                 |          | Lower  | 54.1                  | 49.7-112.0                          |      |                |         |
|                 | K-M      | Higher | 60.0                  |                                     | 1.33 | 1.13-1.57      | 0.00071 |
|                 |          | Lower  | 91.0                  |                                     |      |                |         |
| <i>ITGB4</i>    | TCGA     | Higher | 36.0                  | 31.7-48.5                           | 1.72 | 1.28-2.31      | 0.00026 |
|                 |          | Lower  | 55.1                  | 50.0-87.3                           |      |                |         |
|                 | K-M      | Higher | 53.0                  |                                     | 1.49 | 1.31-1.69      | <0.0001 |
|                 |          | Lower  | 91.0                  |                                     |      |                |         |
| <i>OAS1</i>     | TCGA     | Higher | 39.9                  | 34.2-51.0                           | 1.50 | 1.12-2.01      | 0.0068  |
|                 |          | Lower  | 54.1                  | 46.0-106.0                          |      |                |         |
|                 | K-M      | Higher | 52.2                  |                                     | 1.36 | 1.20-1.55      | <0.0001 |
|                 |          | Lower  | 85.0                  |                                     |      |                |         |
| <i>FHL2</i>     | TCGA     | Higher | 39.9                  | 33.2-49.7                           | 1.49 | 1.11-2.00      | 0.0072  |
|                 |          | Lower  | 54.4                  | 50.5-89.4                           |      |                |         |
|                 | K-M      | Higher | 65.1                  |                                     | 1.14 | 1.00-1.29      | 0.046   |
|                 |          | Lower  | 74.0                  |                                     |      |                |         |
| <i>S100P</i>    | TCGA     | Higher | 40.5                  | 34.8-59.3                           | 1.34 | 1.00-1.79      | 0.050   |
|                 |          | Lower  | 50.0                  | 45.2-72.5                           |      |                |         |
|                 | K-M      | Higher | 62.0                  |                                     | 1.17 | 1.03-1.32      | 0.016   |
|                 |          | Lower  | 76.0                  |                                     |      |                |         |
| <i>FSCNI</i>    | TCGA     | Higher | 38.9                  | 33.2-46.0                           | 1.63 | 1.21-2.19      | 0.0011  |
|                 |          | Lower  | 54.4                  | 50.0-87.3                           |      |                |         |
|                 | K-M      | Higher | 52.0                  |                                     | 1.51 | 1.33-1.71      | <0.0001 |
|                 |          | Lower  | 90.0                  |                                     |      |                |         |
| <i>SFTPD</i>    | TCGA     | Higher | 54.1                  | 42.2-105.6                          | 0.68 | 0.51-0.92      | 0.010   |
|                 |          | Lower  | 41.0                  | 37.2-53.3                           |      |                |         |
|                 | K-M      | Higher | 88.7                  |                                     | 0.66 | 0.58-0.75      | <0.0001 |
|                 |          | Lower  | 50.0                  |                                     |      |                |         |
| <i>DBH-ASI</i>  | TCGA     | Higher | 59.3                  | 42.9-87.3                           | 0.73 | 0.54-0.98      | 0.040   |
|                 |          | Lower  | 41.9                  | 38.2-53.3                           |      |                |         |
|                 | K-M      | Higher | 101.5                 |                                     | 0.74 | 0.63-0.88      | 0.00045 |

|             |      |        |      |           |      |           |         |
|-------------|------|--------|------|-----------|------|-----------|---------|
|             |      | Lower  | 63.4 |           |      |           |         |
| <i>CST3</i> | TCGA | Higher | 51.0 | 47.4-77.3 | 0.71 | 0.53-0.95 | 0.020   |
|             |      | Lower  | 41.5 | 35.8-59.9 |      |           |         |
|             | K-M  | Higher | 93.1 |           | 0.69 | 0.58-0.81 | <0.0001 |
|             |      | Lower  | 57.0 |           |      |           |         |
| <i>SPP1</i> | TCGA | Higher | 42.9 | 34.9-55.1 | 1.38 | 1.03-1.86 | 0.030   |
|             |      | Lower  | 53.9 | 46.0-89.4 |      |           |         |
|             | K-M  | Higher | 57.0 |           | 1.34 | 1.18-1.52 | <0.0001 |
|             |      | Lower  | 85.0 |           |      |           |         |

**Abbreviations:** OS, overall survival; HR, hazard ratio; TCGA, The Cancer Genome Atlas; GSE, Gene Expression Omnibus Series ID; K-M, Kaplan-Meier; 95%CI, 95% confidence interval. P values were determined by log-rank test.

**Table S2. Validation results of 11-gene model in public database and in-house cohorts**

|                                         |        | Median OS<br>(months) | 95%CI of<br>Median OS | HR   | 95%CI of<br>HR | P       |
|-----------------------------------------|--------|-----------------------|-----------------------|------|----------------|---------|
| TCGA                                    | Higher | 59.3                  | 50.5-89.4             | 0.61 | 0.46-0.80      | 0.00028 |
|                                         | Lower  | 39.9                  | 33.2-49.7             |      |                |         |
| GSE8894                                 | Higher | NA                    | NA                    | 0.27 | 0.13-0.54      | 0.00025 |
|                                         | Lower  | 18.5                  | 7.7-32.6              |      |                |         |
| GSE31210                                | Higher | NA                    | NA                    | 0.25 | 0.13-0.49      | 0.00041 |
|                                         | Lower  | NA                    | NA                    |      |                |         |
| GSE68571                                | Higher | NA                    | NA                    | 0.24 | 0.11-0.53      | 0.0018  |
|                                         | Lower  | 79.5                  | 28.2-NA               |      |                |         |
| GSE42127                                | Higher | NA                    | 81.6-NA               | 0.45 | 0.28-0.74      | 0.0019  |
|                                         | Lower  | 62.4                  | 48.0-NA               |      |                |         |
| GSE4573                                 | Higher | 80.9                  | 54.3-NA               | 0.61 | 0.38-0.98      | 0.039   |
|                                         | Lower  | 62.3                  | 26.9-94.5             |      |                |         |
| GSE37745                                | Higher | 64.6                  | 43.7-108.7            | 0.63 | 0.45-0.88      | 0.0048  |
|                                         | Lower  | 34.0                  | 25.5-43.1             |      |                |         |
| GSE30219                                | Higher | 85.0                  | 52.0-118.0            | 0.67 | 0.51-0.89      | 0.0049  |
|                                         | Lower  | 45.0                  | 28.0-71.0             |      |                |         |
| GSE50081                                | Higher | NA                    | 71.5-NA               | 0.62 | 0.39-0.98      | 0.040   |
|                                         | Lower  | 67.2                  | 49.3-NA               |      |                |         |
| NCC-Bulk                                | Higher | NA                    | NA                    | 0.41 | 0.22-0.76      | 0.0074  |
|                                         | Lower  | NA                    | NA                    |      |                |         |
| NCC-ICI<br>(n=40 with OS<br>data)       | Higher | NA (OS)               | 24.3-NA               | 0.37 | 0.16-0.88      | 0.025   |
|                                         | Lower  | 18.3 (OS)             | 8.8-NA                |      |                |         |
| NCC-ICI<br>(n=29 with PFS<br>data)      | Higher | 5.6 (PFS)             | 1.8-25.2              | 0.62 | 0.29-1.34      | 0.18    |
|                                         | Lower  | 3.4 (PFS)             | 1.9-15.3              |      |                |         |
| NCC-ICI-LUAD<br>(n=22 with OS<br>data)  | Higher | NA (OS)               | 21.2-NA               | 0.36 | 0.11-1.12      | 0.073   |
|                                         | Lower  | 28.9 (OS)             | 7.5-NA                |      |                |         |
| NCC-ICI-LUAD<br>(n=16 with PFS<br>data) | Higher | 17.9(PFS)             | 5.9-NA                | 0.35 | 0.11-1.08      | 0.021   |
|                                         | Lower  | 2.0(PFS)              | 1.8-NA                |      |                |         |

**Abbreviations:** OS, overall survival; PFS, progression-free survival; HR, hazard ratio; NA, not applicable; TCGA, The Cancer Genome Atlas; GSE, Gene Expression Omnibus Series ID; CI, confidence interval; NCC, National Cancer Center; ICI, Immune checkpoint inhibitor. P values were determined by log-rank test.

## Supplementary Figures and legends

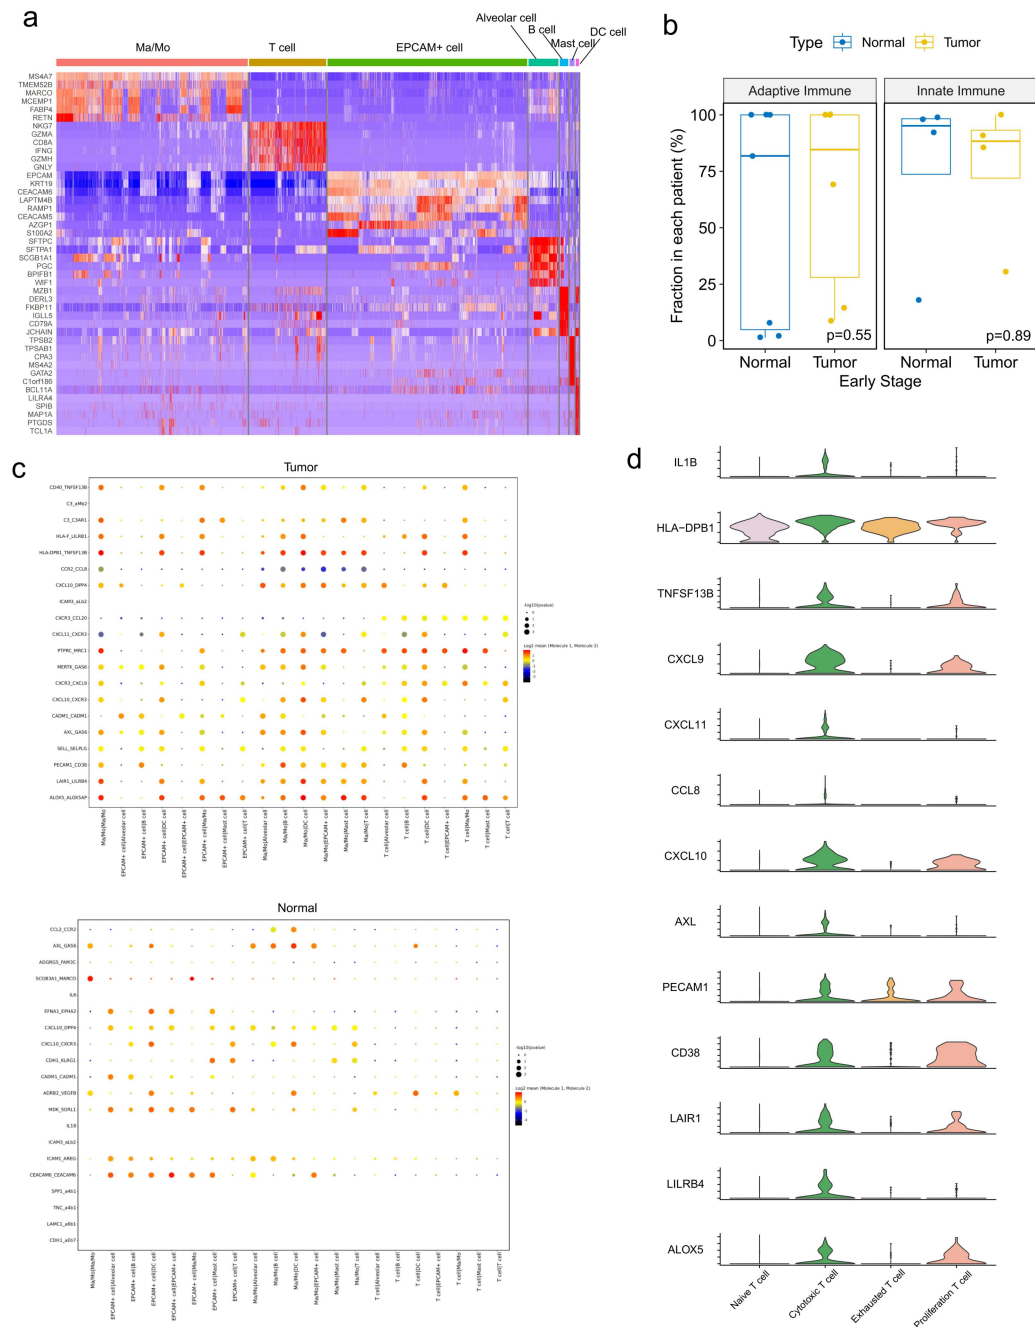

**Figure S1. Detailed cluster information and related analysis.**

- (a) The heatmap of gene expression level grouped by different cell types.
- (b) Different fraction of adaptive/innate immune cells between adenocarcinoma and normal samples.
- (c) Differentially expressed ligands/receptors in tumor and normal tissues.
- (d) Important receptor - ligand molecules and their expression levels between different T cells.

**Abbreviations:** EPCAM, epithelial cell adhesion molecule; Ma/Mo, macrophage and monocyte.

We used Wilcoxon rank-sum test in different fraction analysis.

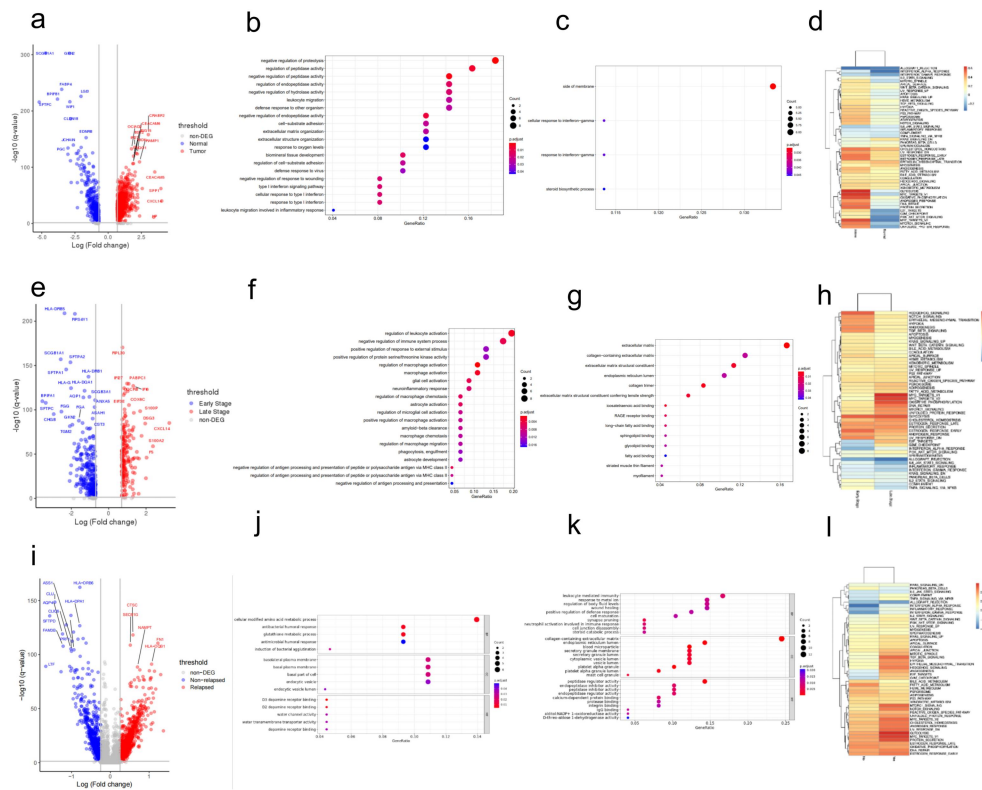

**Figure S2. Functional and survival details of EPCAM+ cells related genes.**

(a) Volcano map of differential genes between EPCAM+ cells in tumor and normal tissues.

(b) Functional analysis of tumor-related DEGs.

(c) Functional analysis of normal tissue-related DEGs.

(d) Enrichment analysis of DEGs between EPCAM+ cells in tumor vs normal tissues.

(e) Volcano map of differential genes between EPCAM+ cells in patients with early and late stage.

(f) Functional analysis of early stage-related DEGs.

(g) Functional analysis of late stage-related DEGs.

(h) Enrichment analysis of DEGs between EPCAM+ cells in patients with early vs late stage.

(i) Volcano map of differential genes between EPCAM+ cells in relapsed and non-relapsed patients.

(j) Functional analysis of relapse-related DEGs.

(k) Functional analysis of non-relapse-related DEGs.

(l) Enrichment analysis of DEGs between EPCAM+ cells in relapsed vs. non-relapsed patients.

**Abbreviations:** EPCAM, epithelial cell adhesion molecule; DEG, differentially-expressed gene.

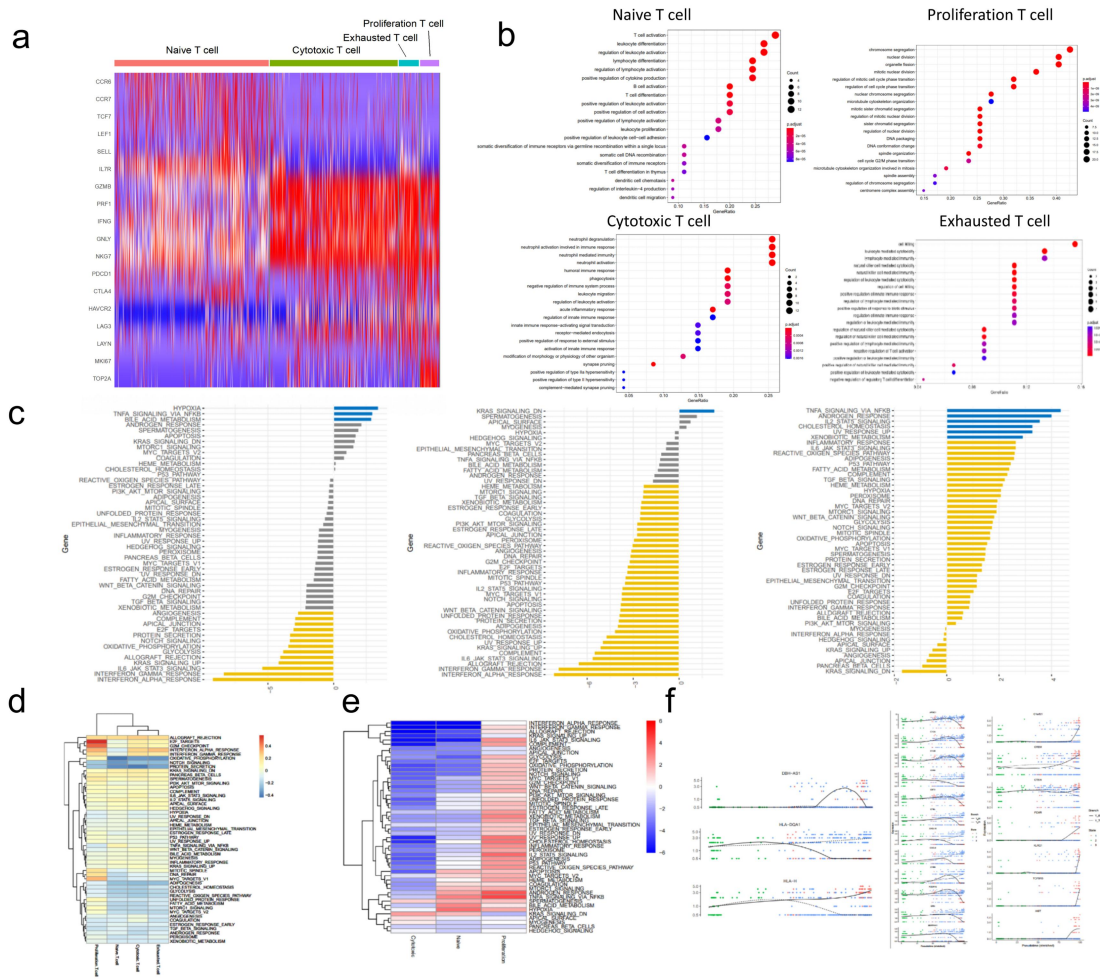

**Figure S3. The T cell subsets and relevant analysis.**

(a) Heatmap of key genes grouped by four T cell subsets.

(b) Functional analysis of four T cell subsets.

(c) The functions of naïve T cells, toxic T cells and proliferative T cells between tumor tissues and normal tissues.

(d) Hallmark function enrichment analysis of four T cell subsets.

(e) Functional analysis of naïve T cells, toxic T cells and proliferative T cells between tumor tissues and normal tissues.

(f) Identification of gene and T cell differentiation trajectory.

**Abbreviations:** DEG, differentially expressed genes; HR, hazard ratio.

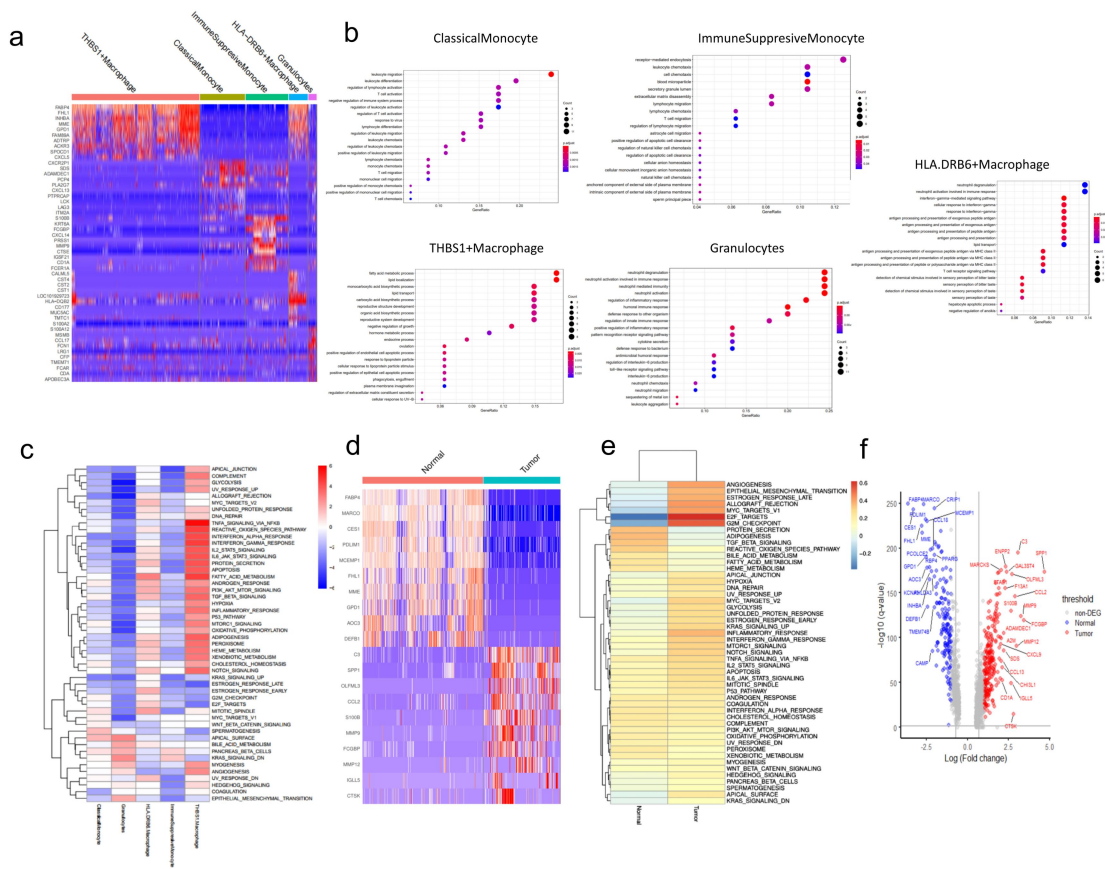

**Figure S4. Functional details of five different Ma/Mo subsets.**

- (a) Heatmap of key genes grouped by different Ma/Mo cell subsets
- (b) Bubble plots of enrichment analysis of DEGs between tumor and normal cells in five different Ma/Mo groups.
- (c) Hallmark pathways analysis of different Ma/Mo subsets.
- (d) Heatmap shows differences in the expression of Ma/Mo-related genes between tumor and normal cells.
- (e) Hallmark functional analysis of differentially-expressed genes on Ma/Mo cells between tumor tissues and normal tissues.
- (f) Volcano plot of Ma/Mo related DEGs in tumor and normal cells.

**Abbreviations:** DEG, differentially expressed genes; Ma/Mo, macrophage and monocyte.



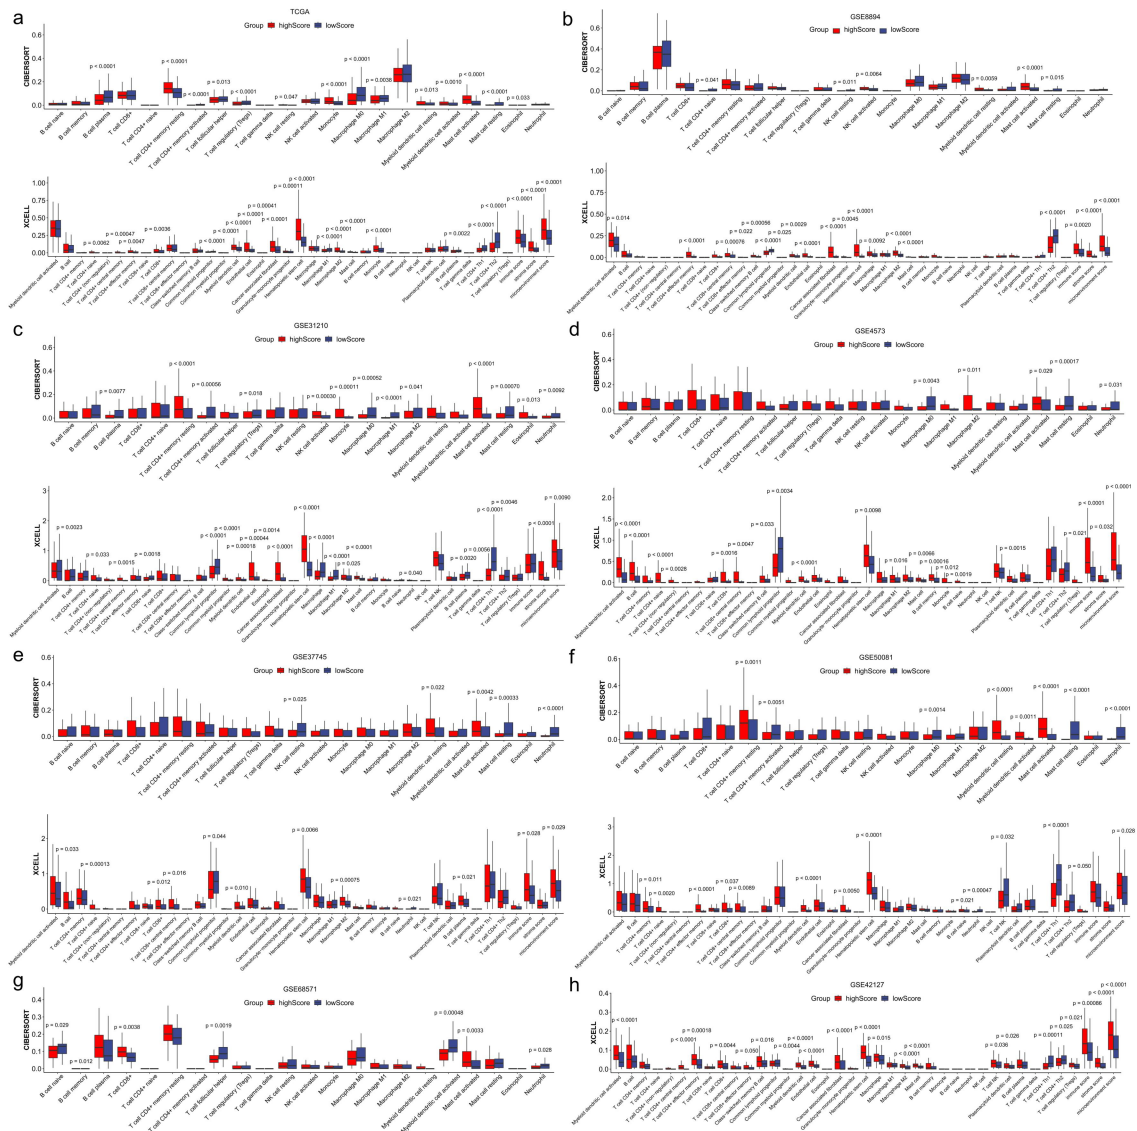

**Figure S5. CIBERSORT and XCELL results of tumor microenvironment in TCGA and GSE datasets.**

- (a) Validation of tumor microenvironment in TCGA.
- (b) Validation of tumor microenvironment in GSE8894.
- (c) Validation of tumor microenvironment in GSE31210.
- (d) Validation of tumor microenvironment in GSE4573.
- (e) Validation of tumor microenvironment in GSE37745.
- (f) Validation of tumor microenvironment in GSE50081.
- (g) Validation of tumor microenvironment in GSE68571.
- (h) Validation of tumor microenvironment in GSE42127.

p values were determined by Wilcoxon rank-sum test.

**Abbreviations:** GSE, Gene Expression Omnibus Series ID; TCGA, The Cancer Genome Atlas.

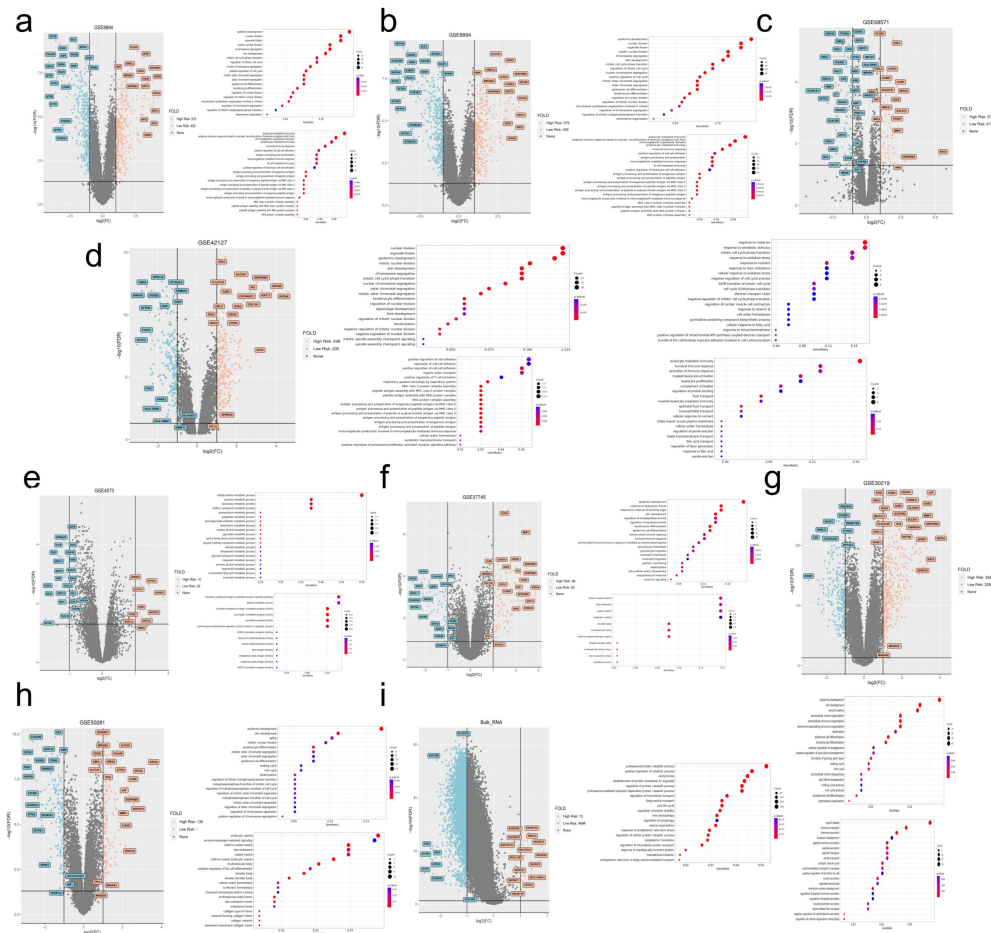

**Figure S6. Volcano and bubble plots of functional analysis in GSE and bulk datasets.**

- (a) Functional analysis in GSE8894.
- (b) Functional analysis in GSE31210.
- (c) Functional analysis in GSE68571.
- (d) Functional analysis in GSE42127.
- (e) Functional analysis in GSE4573.
- (f) Functional analysis in GSE37745.
- (g) Functional analysis in GSE30219.
- (h) Functional analysis in GSE50081.
- (i) Functional analysis in NCC-bulk dataset.

**Abbreviations:** FC, fold change; FDR, False Discovery Rate; GSE, Gene Expression Omnibus Series ID, TCGA, The Cancer Genome Atlas; NCC, National Cancer Center.

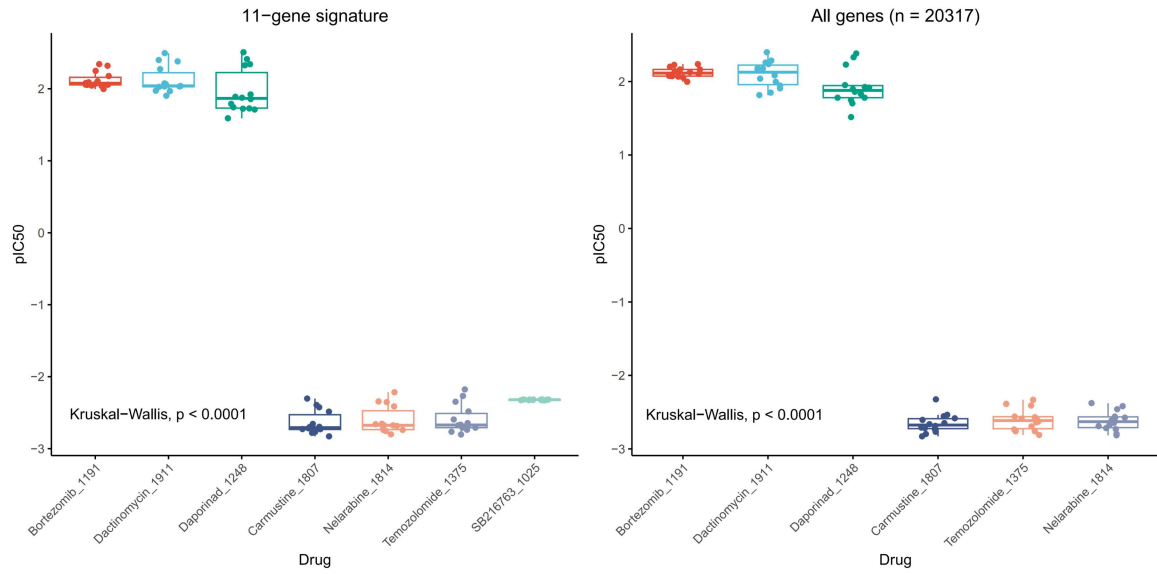

**Figure S7. Results of drug sensitivity analysis.**

The drug sensitivity analysis test of patients showed that there were significant statistical differences among different drug sensitivities, similar between 11-gene model (left) and all RNA profiles (right). P values were determined by Kruskal-Wallis test.
