# Supplementary material for: A single-cell characterised signature integrating heterogeneity and microenvironment of lung adenocarcinoma for prognostic stratification
Source: PubMed Central journal article supplement — eBioMedicine. 2024 Mar 28;102:105092. doi: 10.1016/j.ebiom.2024.105092 (PMC10990706; doi:10.1016/j.ebiom.2024.105092), 2024-03-28
Supplement: mmc2.pdf [file mmc2.pdf]

# Resource Summary Report

Generated by [RRID](#) on Jan 13, 2024

## Tritest CD4 FITC/CD8 PE/CD3 PerCP IVD

RRID:AB\_400457

Type: Antibody

---

### Proper Citation

(BD Biosciences Cat# 340298, RRID:AB\_400457)

---

### Antibody Information

**URL:** [http://antibodyregistry.org/AB\\_400457](http://antibodyregistry.org/AB_400457)

**Proper Citation:** (BD Biosciences Cat# 340298, RRID:AB\_400457)

**Target Antigen:** CD3

**Host Organism:** mouse

**Clonality:** monoclonal

**Comments:** Applications: Flow cytometry

**Antibody Name:** Tritest CD4 FITC/CD8 PE/CD3 PerCP IVD

**Description:** This monoclonal targets CD3

**Target Organism:** human

**Antibody ID:** AB\_400457

**Vendor:** BD Biosciences

**Catalog Number:** 340298

---

### Ratings and Alerts

No rating or validation information has been found for Tritest CD4 FITC/CD8 PE/CD3 PerCP IVD.

No alerts have been found for Tritest CD4 FITC/CD8 PE/CD3 PerCP IVD.

---

## Data and Source Information

**Source:** [Antibody Registry](#)

---

## Usage and Citation Metrics

We have not found any literature mentions for this resource.

# Resource Summary Report

Generated by [RRID](#) on Jan 13, 2024

## Mouse Anti-CD206 Monoclonal Antibody, Allophycocyanin Conjugated, Clone 19.2

RRID:AB\_398476

Type: Antibody

---

### Proper Citation

(BD Biosciences Cat# 550889, RRID:AB\_398476)

---

### Antibody Information

**URL:** [http://antibodyregistry.org/AB\\_398476](http://antibodyregistry.org/AB_398476)

**Proper Citation:** (BD Biosciences Cat# 550889, RRID:AB\_398476)

**Target Antigen:** CD206 (Mannose Receptor)

**Host Organism:** mouse

**Clonality:** monoclonal

**Comments:** Applications: Flow cytometry

**Antibody Name:** Mouse Anti-CD206 Monoclonal Antibody, Allophycocyanin Conjugated, Clone 19.2

**Description:** This monoclonal targets CD206 (Mannose Receptor)

**Target Organism:** human

**Clone ID:** 19.2

**Antibody ID:** AB\_398476

**Vendor:** BD Biosciences

**Catalog Number:** 550889

---

### Ratings and Alerts

No rating or validation information has been found for Mouse Anti-CD206 Monoclonal Antibody, Allophycocyanin Conjugated, Clone 19.2.

No alerts have been found for Mouse Anti-CD206 Monoclonal Antibody, Allophycocyanin Conjugated, Clone 19.2.

---

## Data and Source Information

**Source:** [Antibody Registry](#)

---

## Usage and Citation Metrics

We found 1 mentions in open access literature.

**Listed below are recent publications.** The full list is available at [RRID](#).

Trim WV, et al. (2021) The impact of long-term physical inactivity on adipose tissue immunometabolism. The Journal of clinical endocrinology and metabolism.
